# Supplementary material for: Impacts of ice-nucleating particles on cirrus clouds and radiation derived from global model simulations with MADE3 in EMAC
Source: Copernicus journal article supplement (doi:10.5194/egusphere-2023-1983), 2023-09-04
Supplement: Supplementary file 1 [file egusphere-2023-1983-supplement.pdf]

*Supplement of*

# **Impacts of ice-nucleating particles on cirrus clouds and radiation derived from global model simulations with MADE3 in EMAC**

Christof G. Beer<sup>1</sup>, Johannes Hendricks<sup>1</sup>, and Mattia Righi<sup>1</sup>

<sup>1</sup>Deutsches Zentrum für Luft- und Raumfahrt (DLR), Institut für Physik der Atmosphäre, Oberpfaffenhofen, Germany

**Correspondence:** Christof Beer (christof.beer@dlr.de)

This Supplement contains additional figures complementing the evaluation of our model results presented in Sect. 3 of the paper. Details about each figure can be found in the corresponding sections of the paper as mentioned in the supplement figure captions.

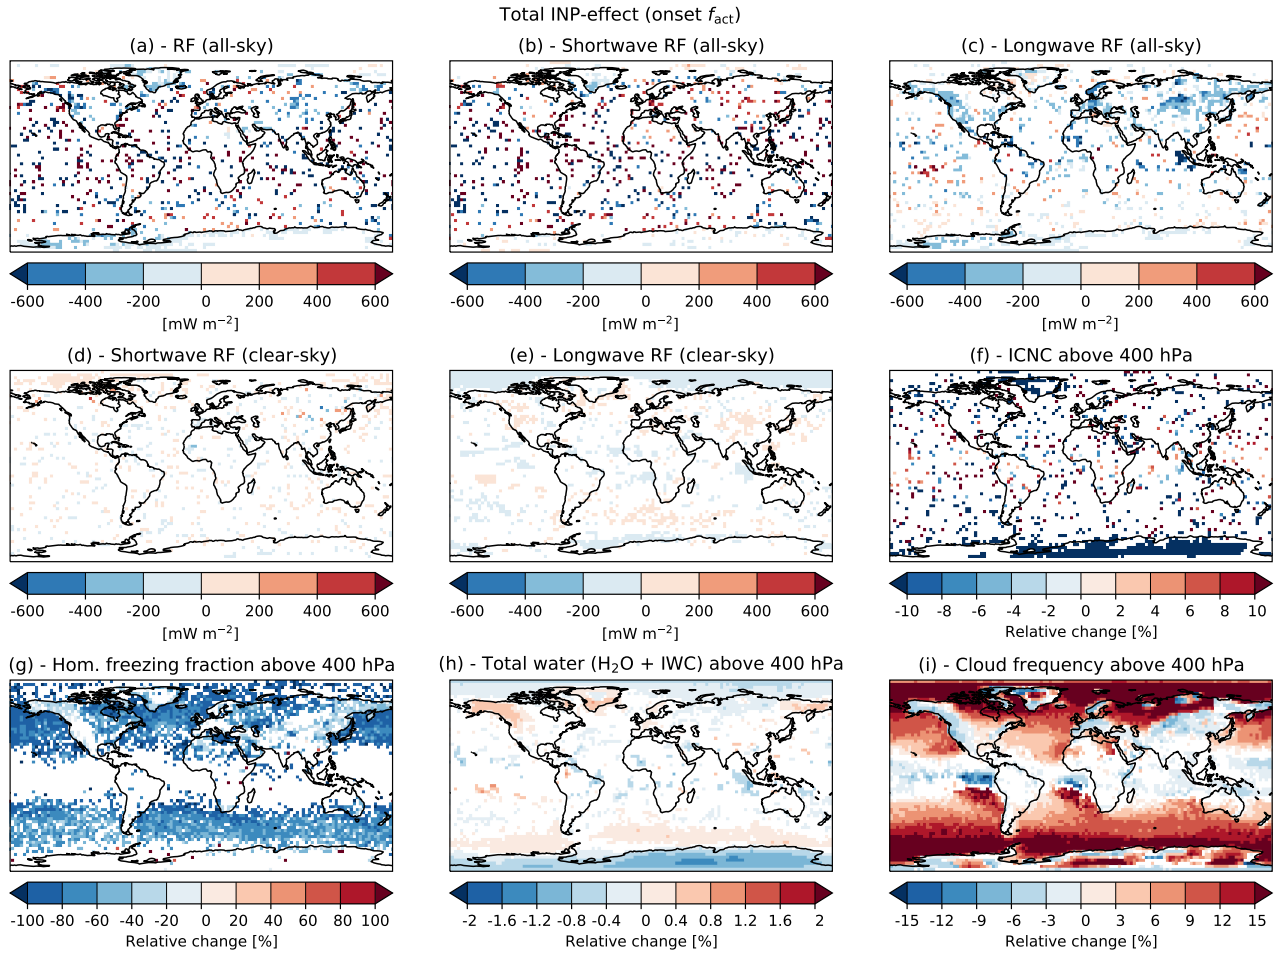

**Figure S1.** As in Fig. 1, but showing the geographic distribution of the simulated total INP-cirrus effect on the different radiation and cloud variables considering all INP types. Panels (a-e) represent radiative forcings at the top of the atmosphere, panels (f-i) show averaged cloud properties above 400 hPa.

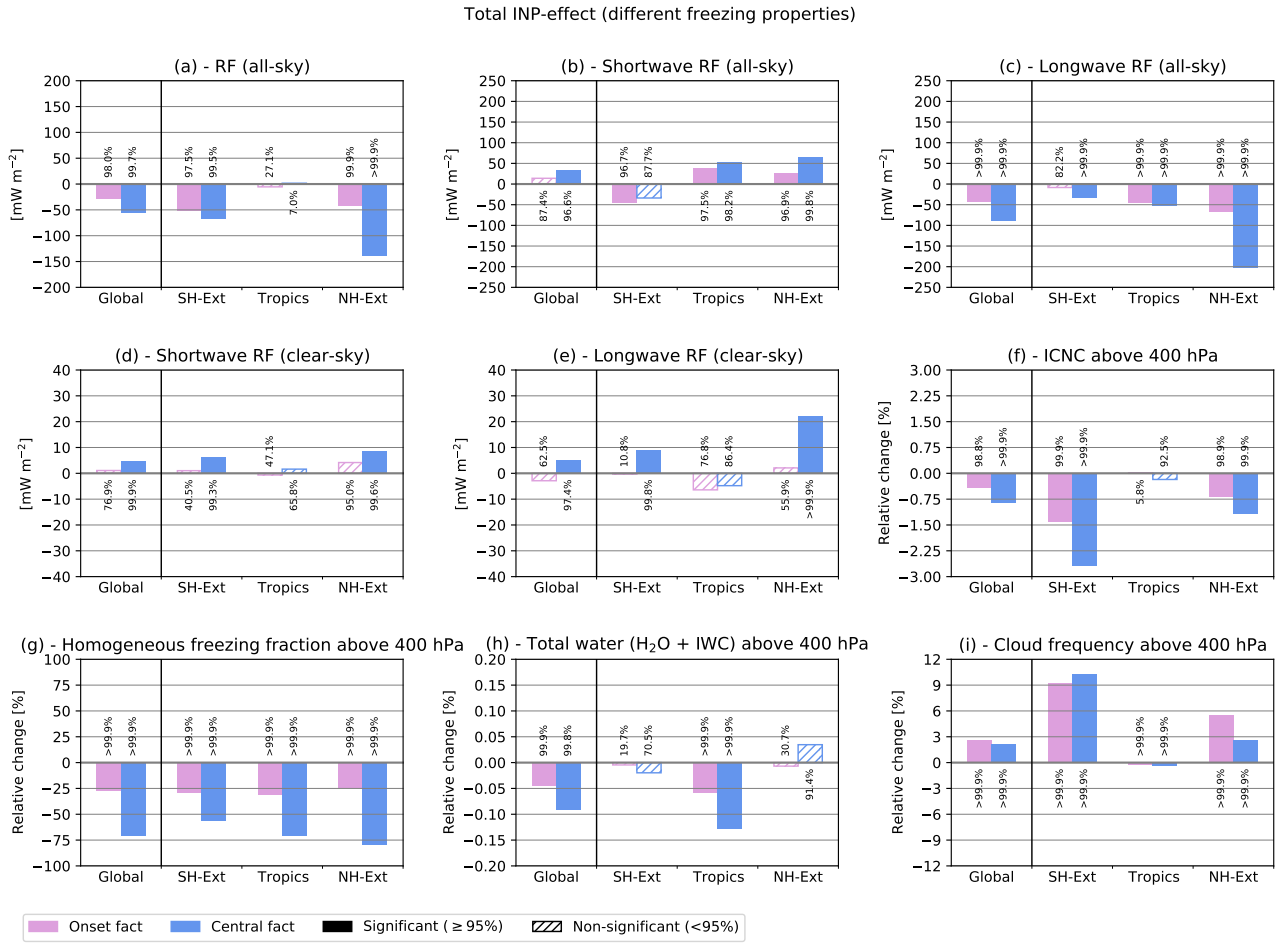

**Figure S2.** As in Fig. 2, but additionally showing all simulated variables from Fig. 1.

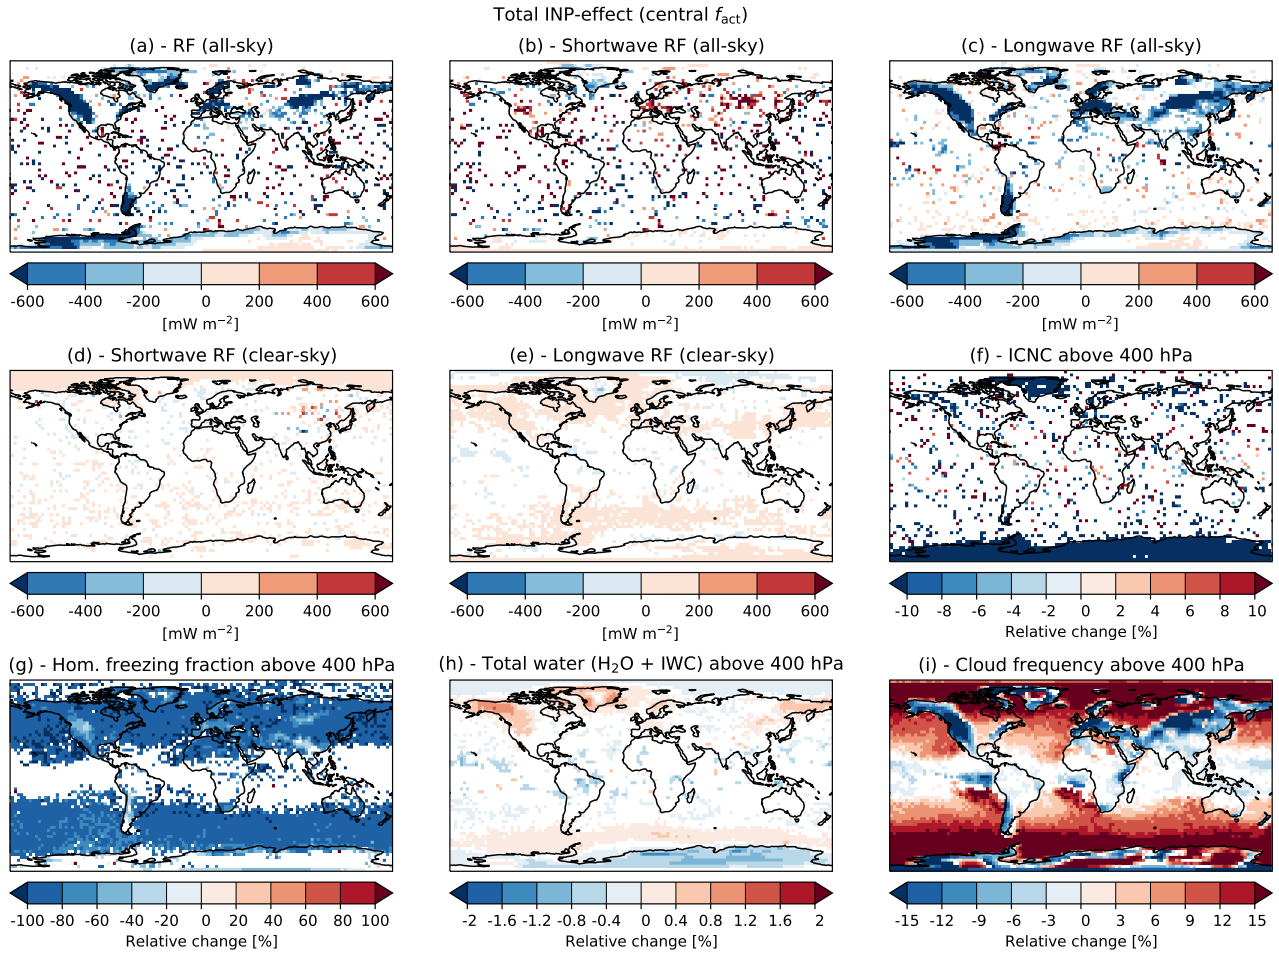

**Figure S3.** As in Fig. S2, but showing the geographic distribution of the simulated total INP-cirrus effect on the different radiation and cloud variables considering all INP types and an increased freezing potential of INPs (central  $f_{act}$ ). Panels (a-e) represent radiative forcings at the top of the atmosphere, panels (f-i) show averaged cloud properties above 400 hPa.

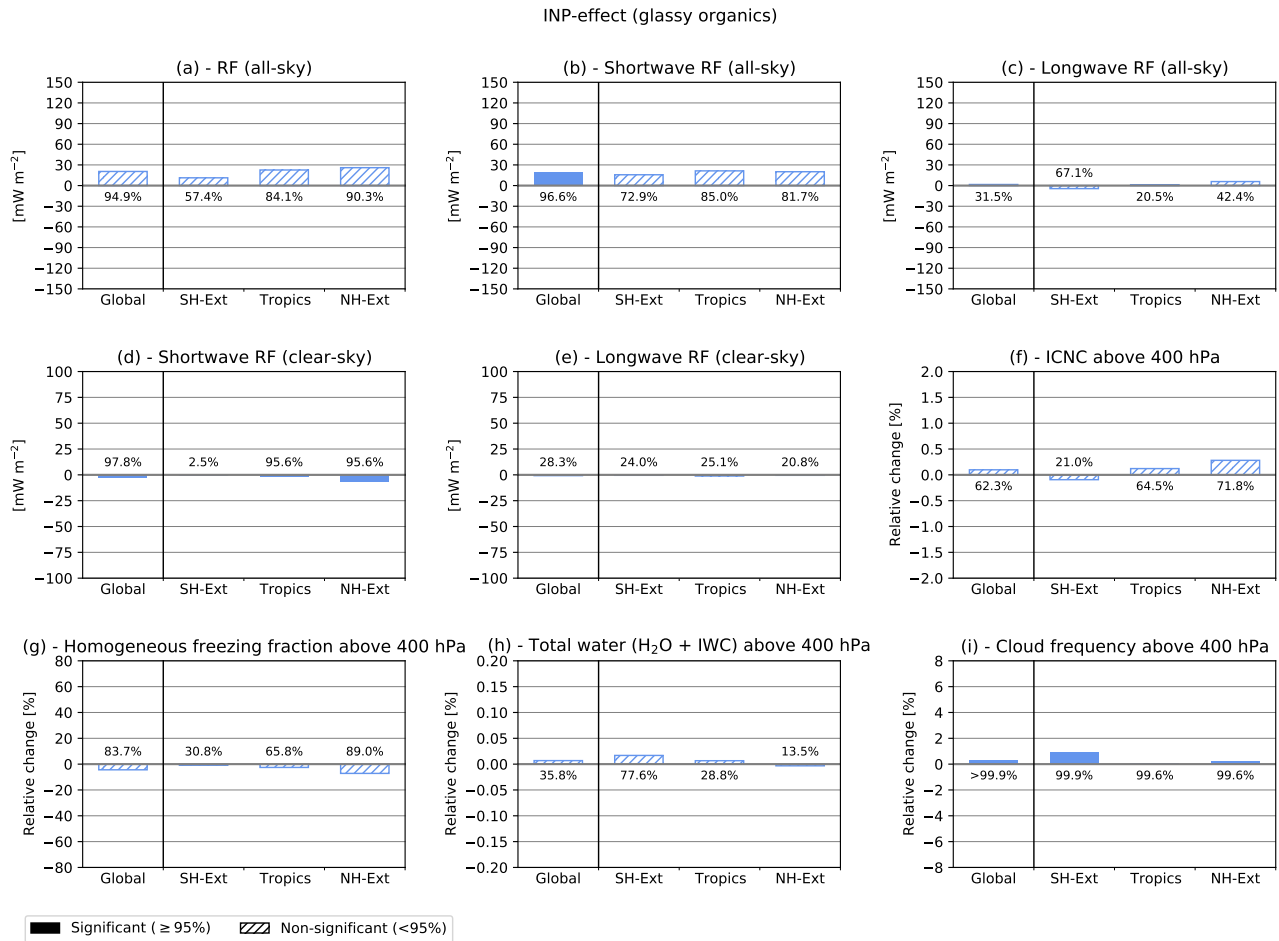

**Figure S4.** As in Fig. 4, but showing the INP-cirrus effect induced by glassy organics, calculated from the difference between a simulation including gIPOM, DU and BC INPs, and a simulation including only heterogeneous freezing on DU and BC.

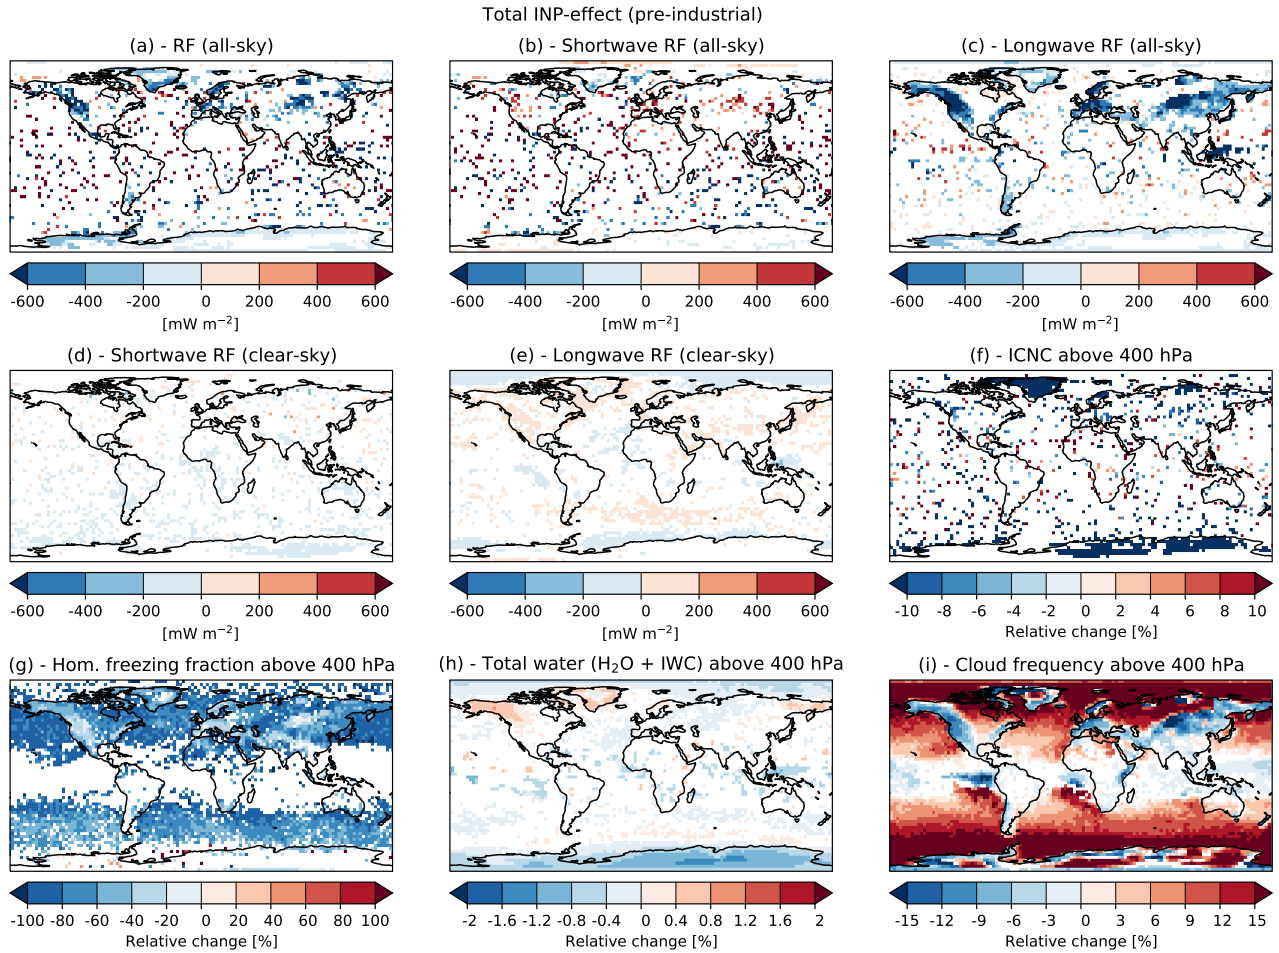

**Figure S5.** As in Fig. S3, but showing the geographic distribution of the simulated total INP-cirrus effect on the different radiation and cloud variables considering pre-industrial (1750) conditions. Panels (a-e) represent radiative forcings at the top of the atmosphere, panels (f-i) show averaged cloud properties above 400 hPa.

Vertical velocity 20 cm/s: nudged vs. free-running

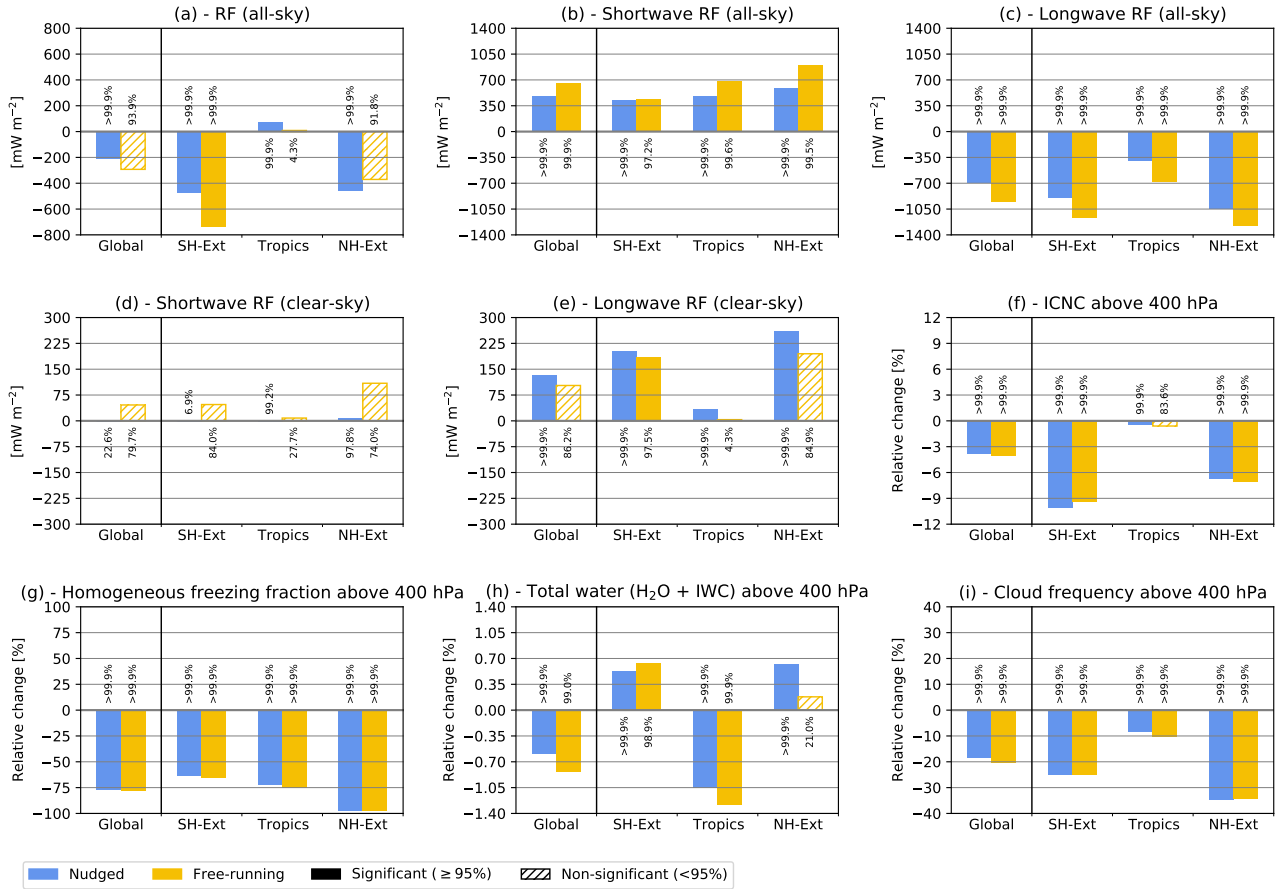

**Figure S6.** As in Fig. 1, but showing the total INP-cirrus effect for a prescribed vertical velocity of  $20 \text{ cm s}^{-1}$  simulated with a nudged (blue) and a free-running (yellow) model setup.

Total INP-effect: sensitivity to the vertical velocity (scaling)

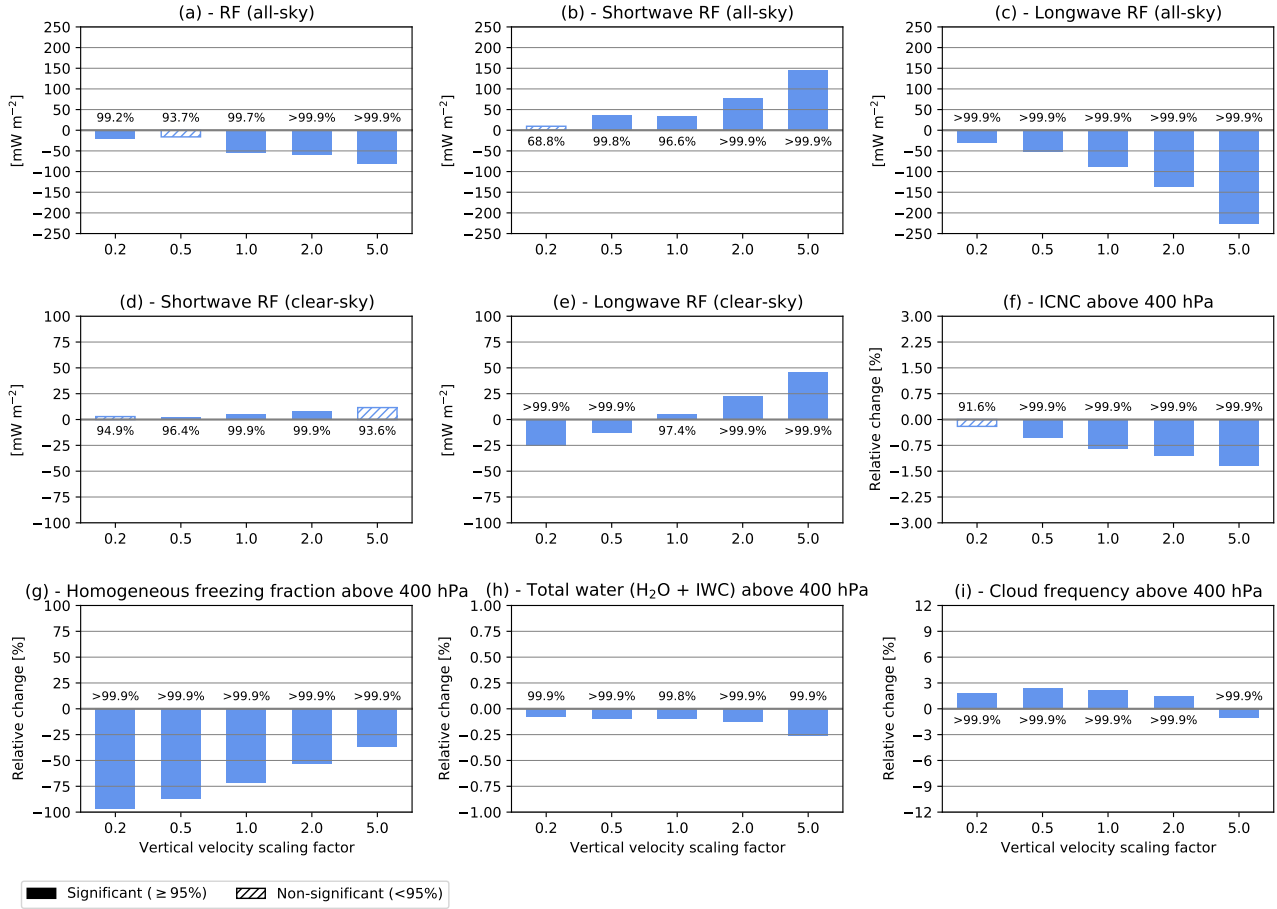

**Figure S7.** As in Fig. 6, but showing the sensitivity of the total INP-cirrus effect (enhanced ice-nucleating properties of INPs) to the scaling of the parametrized vertical velocity considering scaling factors of 0.2, 0.5, 1.0 (i.e. the reference case), 2.0, and 5.0.



Highly efficient INPs (100/L): free-running

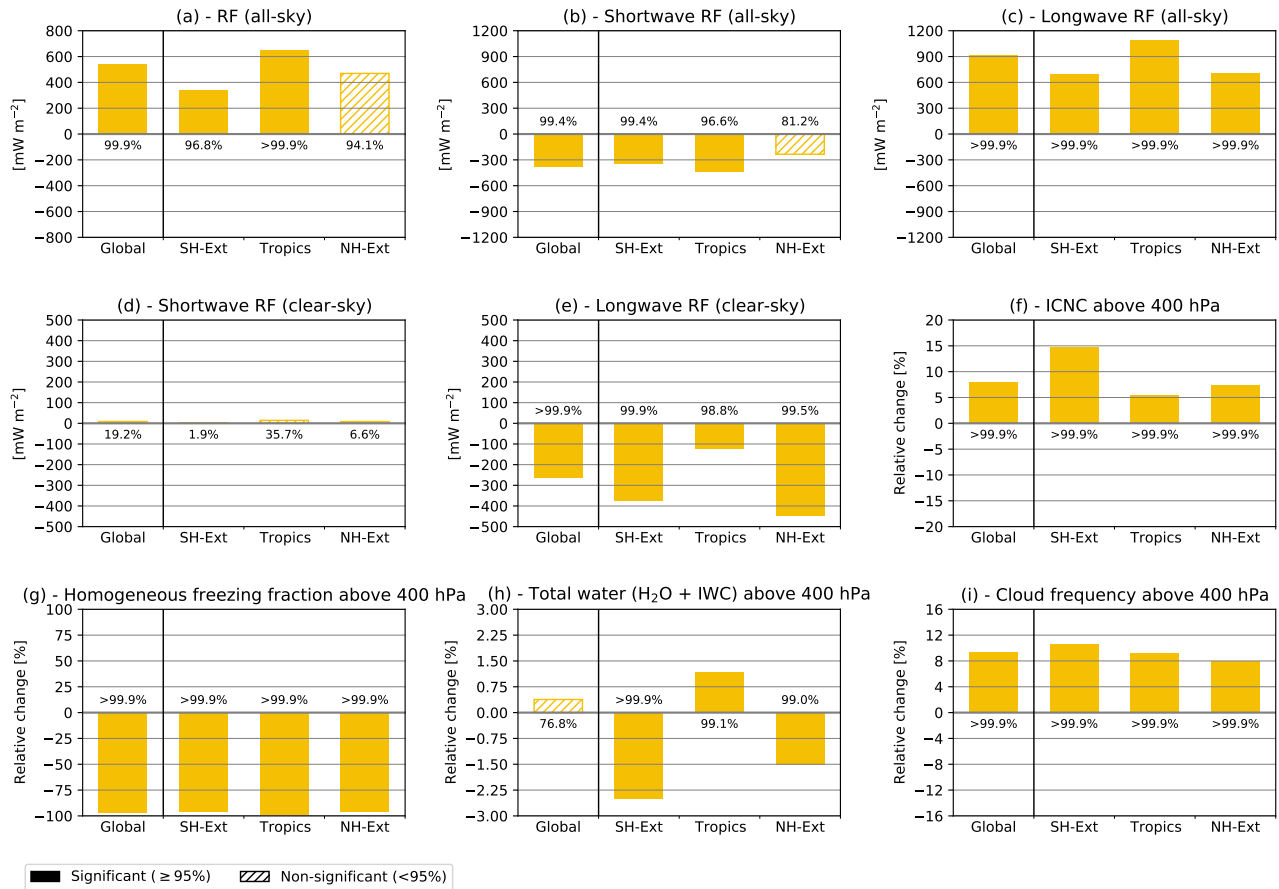

Figure S8. As in Fig. 1, but showing the INP-cirrus effect for highly efficient INPs (100 L<sup>-1</sup>) for a free-running model setup.
